# Supplementary material
Source: bioRxiv or medRxiv preprint supplement (https://www.biorxiv.org/highwire/filestream/117130/field_highwire_adjunct_files/1/385716-2.pdf)
Supplement: Supplementary file [file 385716-2.pdf]

## Supplementary information

### Mini viral RNAs act as innate immune agonists during influenza virus infection

Aartjan J.W. te Velhuis<sup>1,2,\*§</sup>, Joshua C. Long<sup>1,\*</sup>, David L.V. Bauer<sup>1,\*</sup>, Rebecca L.Y. Fan<sup>3</sup>, Hui-Ling Yen<sup>3</sup>, Jane Sharps<sup>1</sup>, Jurre Y. Siegers<sup>4</sup>, Marian J. Killip<sup>1,5</sup>, Hollie French<sup>2</sup>, Maria José Oliva-Martín<sup>1</sup>, Richard E. Randall<sup>5</sup>, Emmie de Wit<sup>6</sup>, Debby van Riel<sup>4</sup>, Leo L.M. Poon<sup>3</sup>, Ervin Fodor<sup>1,§</sup>

<sup>1</sup> Sir William Dunn School of Pathology, University of Oxford, South Parks Road, Oxford OX1 3RE, United Kingdom.

<sup>2</sup> Division of Virology, Department of Pathology, University of Cambridge, Addenbrooke's Hospital, Hills Road, Cambridge CB2 0QQ, United Kingdom.

<sup>3</sup> School of Public Health, University of Hong Kong, 21 Sassoon Road, Pokfulam, Hong Kong SAR, China.

<sup>4</sup> Department of Viroscience, Erasmus Medical Centre, 3015 CN, Rotterdam, The Netherlands.

<sup>5</sup> Biomedical Sciences Research Complex, University of St Andrews, North Haugh, St Andrews, Fife KY16 9ST, United Kingdom.

<sup>6</sup> Laboratory of Virology, Division of Intramural Research, National Institute of Allergy and Infectious Diseases, National Institutes of Health, Hamilton, Montana, USA

\* These authors contributed equally to this work.

§ Corresponding authors

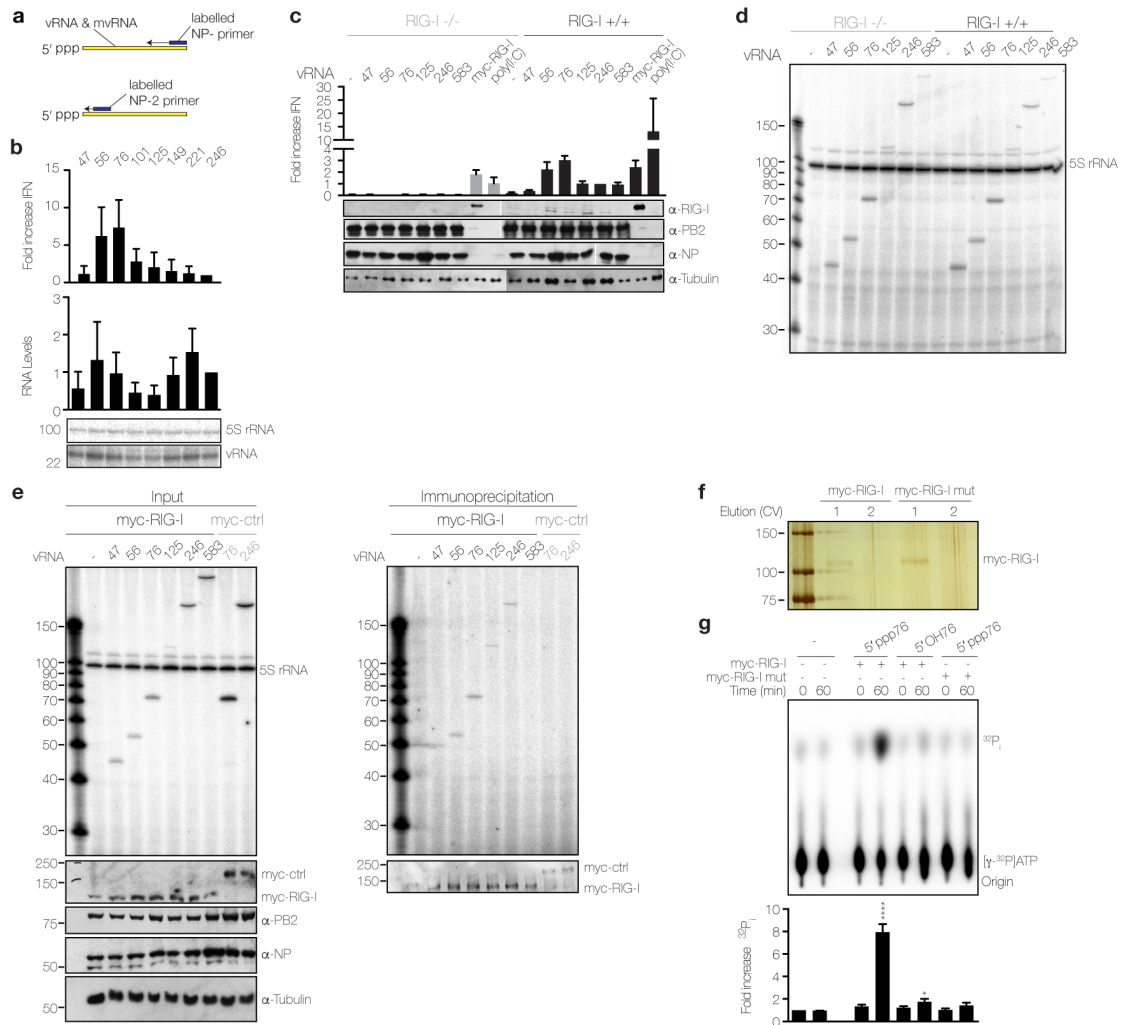

**Figure S1 | Induction of IFN- $\beta$  promoter activity by replication of mvRNAs and binding of mvRNAs to RIG-I.** (a) Schematic of primer extension analysis using primers binding at the 3' end of vRNAs (NP-) or to an internal sequence (NP-2). (b) IFN- $\beta$  promoter activity induced by the replication of segment 5-based vRNA templates before normalisation to RNA levels measured by primer extension with primer NP-2. Normalised data is shown in Fig. 1c. (c) INF- $\beta$  promoter activity induced by the replication of segment 5-based vRNA templates in wild-type (RIG-I +/+) or RIG knockout (RIG-I -/-) HEK 293T cells expressing luciferase from an IFN- $\beta$  promoter. (d) Primer extension performed with primer NP- on samples from Fig. S1c. (e) Detection of segment 5-derived vRNAs with the NP- primer before and after myc-RIG-I or myc-EGF immunoprecipitation. Normalised data is shown in Fig. 1e. (f) SDS-PAGE and silverstain analysis of myc-RIG-I elutions per column volume (CV). (g) ATPase assay of wildtype myc-RIG-I or mutant (mut) in the presence of a triphosphorylated 76 nt mvRNA (5' ppp76) or a dephosphorylated mvRNA (5' OH76). In all panels, error bars indicate standard deviation. P-values were determined using ANOVA relative to the 0 min buffer control and are indicated as \*  $P \leq 0.05$  and \*\*\*\*  $P \leq 0.0001$ .

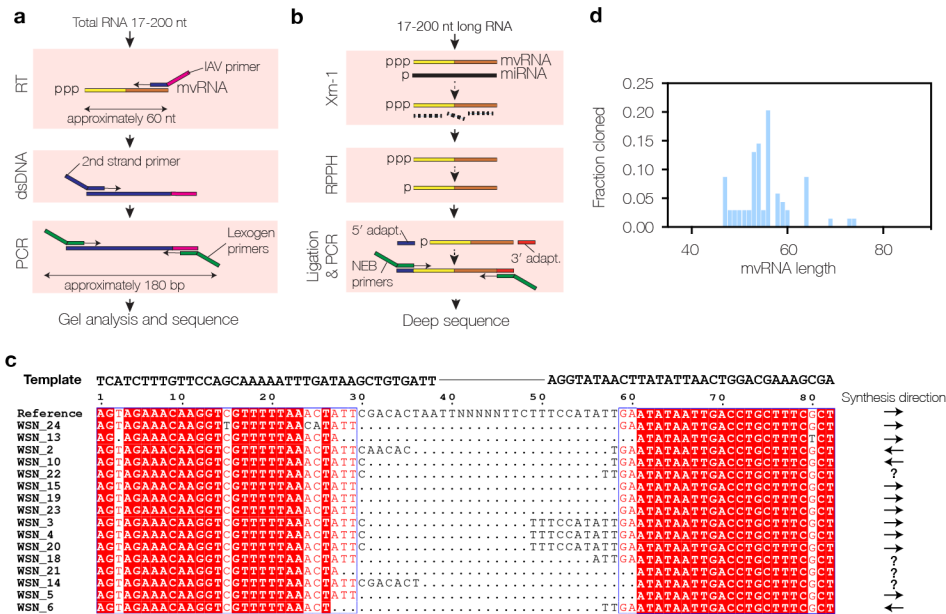

**Figure S2 | Deep sequencing schematic and alignment of cloned mVRNAs.** (a) Schematic of deep sequencing protocol using universal primers for the influenza A virus (IAV) promoter. (b) Deep sequencing via adapter ligation was performed on the total small RNA fraction (RNAs 17-200 nt in length) after treatment with XRN-1 and RppH. (c) Alignment and (d) size distribution of segment 1-derived mVRNAs generated during infection with influenza A/WSN/33 (H1N1) virus in the presence of overexpressed viral polymerase. Sequences were produced after gel extraction and Sanger sequencing. The possible direction of synthesis (vRNA to mVRNA or cRNA to mVRNA) via the intramolecular copy-choice model is indicated. Unknown directions of synthesis are indicated with ‘?’.

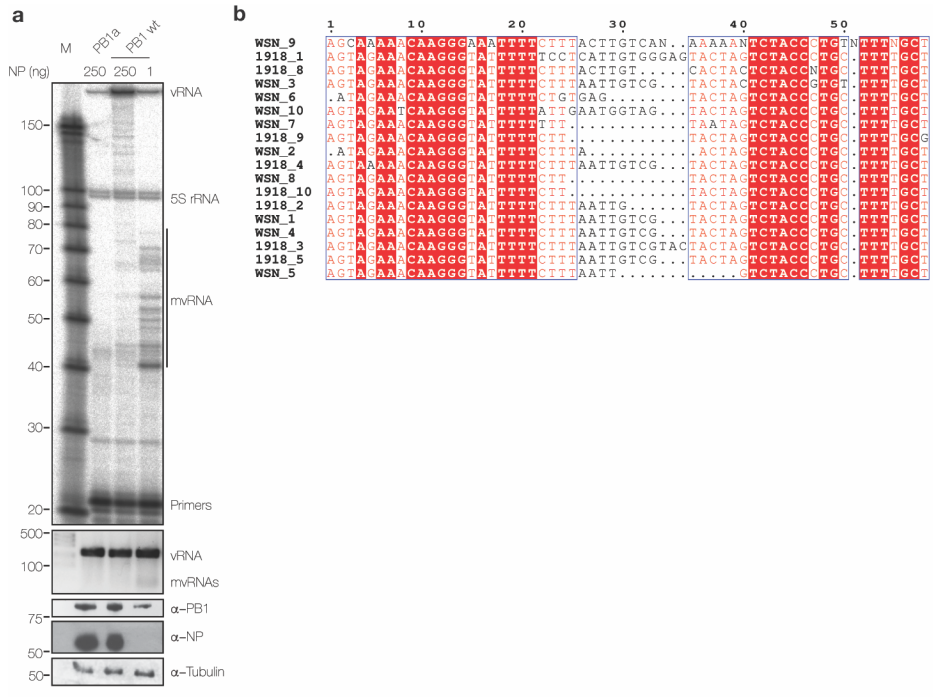

**Figure S3 | mvRNAs synthesis in replication assays with WSN polymerase in the presence of limiting NP and alignment of cloned mvRNAs.** (a) Analysis of steady state RNA levels in replication assays with an active site mutant WSN PB1 (PB1a) or WSN PB1 wild-type (PB1 wt) and a 246-nt vRNA that was derived from segment 5 of the influenza A virus genome, in the presence of limiting NP. The NP- primer was used for primer-extension analysis. (b) Alignment of mvRNAs generated in replication assays with the WSN (from panel a) and BM18 polymerases (from Fig. 3a) from segment 5-derived 246 nt vRNA template.

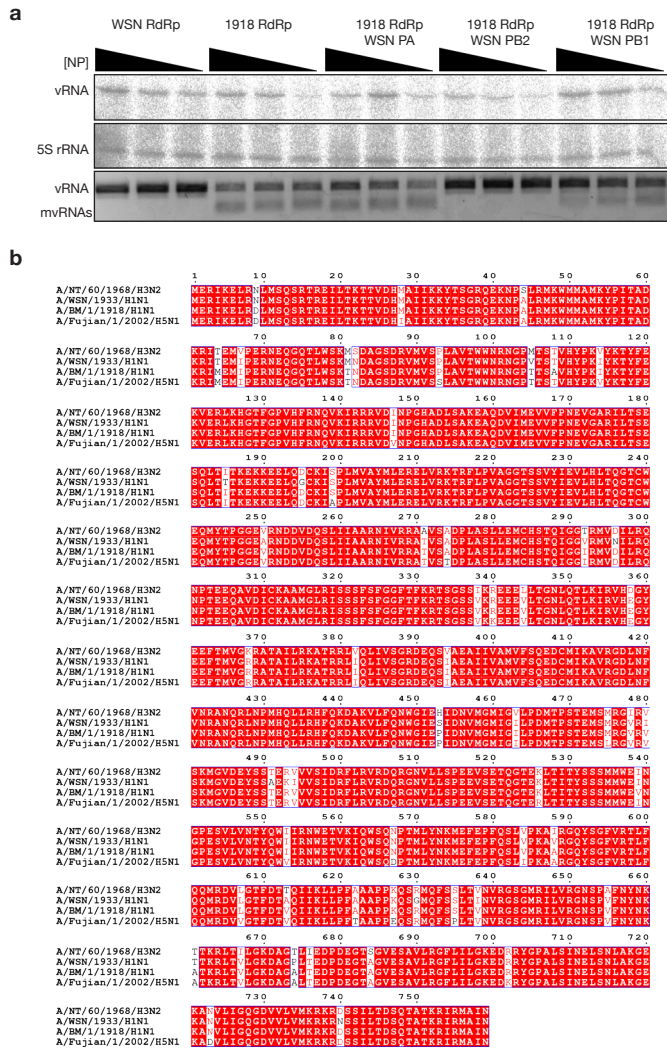

**Figure S4 | mvRNA synthesis by reassorted WSN and BM18 polymerases and sequence alignments of the PB2 subunit. (a)** Analysis of steady state RNA levels in replication assays with WSN and BM18 polymerases and their reassortants and a 246-nt vRNA that was derived from segment 5 of the influenza A virus genome, in the presence of decreasing NP. **(b)** Amino acid sequence alignment of the PB2 subunits of A/WSN/33 (H1N1) (accession number ACF54608), A/Brevig Mission/1/18 (H1N1) (accession number ABA55038), A/Northern Territory/60/68 (H3N2) (accession number AAA43613), and A/duck/Fujian/1/2002 (H5N1) (accession number AY585504) influenza viruses.

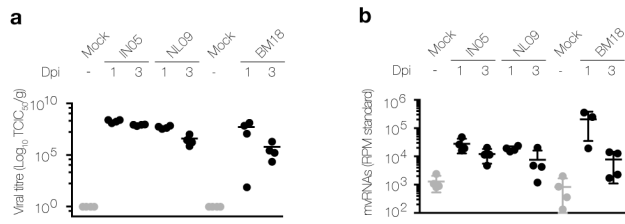

**Figure S5 | Viral titre and mvRNA levels in ferret lungs.** (a) Published viral titres of ferret lung tissue samples<sup>29,30</sup>. (b) mvRNA levels in lungs of ferrets one and three days after infection with IN05, NL09 or BM18 as measured using deep sequencing.

**Table S1 | Primers for RdRp subunit mutagenesis**

| Mutant           | Fw/rv | Sequence (5' to 3')                                   |
|------------------|-------|-------------------------------------------------------|
| PB1 V43I         | Fw    | GGAACAGGATACACCATGGATACTATTAACAGGACACATCAGTACTCAG     |
|                  | Rv    | CTGAGTACTGATGTGTCCTGTTAATAGTATCCATGGTGTATCCTGTTCC     |
| PB2 E627K        | Fw    | CATTTGCAGCAGCCCCACCGAAGCAGAGCAGAATGCAGTTTTCTTC        |
|                  | Rv    | GAAGAAAACCTGCATTCTGCTCTGCTTCGGTGGGGCTGCTGCAAATG       |
| PB2 T64M         | Fw    | CCAATTACAGCAGACAAGAGGATAATGGAAATGATTCCCTGAGAGAAATGAGC |
|                  | Rv    | GCTCATTCTCTCAGGAATCATTTCATTATCCTCTTGCTGCTGTAATTGG     |
| PB2 M81T         | Fw    | CAGGGACAAACTTTATGGAGTAAAACGAATGACGCCGGATCAGAC         |
|                  | Rv    | GTCTGATCCGGCGTCATTTCGTTTTACTCCATAAAGTTTGTCCCTG        |
| Myc-RIG-I<br>mut | Fw    | AAGTTTTGAAGCAAGAGCAGCGATATTCTGTGCCCGACAGAAGTGCAGC     |
|                  | Rv    | GAAAACCTGCGCTGGCTTGGGATGTGGTCTACTCACAAAGCATTCC        |

**Table S2 | RNA templates**

| Template      | Sequence (5' to 3')                                                                                                                                                                                                                                  |
|---------------|------------------------------------------------------------------------------------------------------------------------------------------------------------------------------------------------------------------------------------------------------|
| NP47          | AGUAGAAACAAGGGUAUUUUUCUJUUUCUGAGCGUACUJAGUCUJACCCUGCUUUUGCU                                                                                                                                                                                          |
| NP76          | AGUAGAAACAAGGGUAUUUUUCUJUUACUJAGUGAUUUUGAUGUCACUCUGUGAGUGAUUAUCUJACCCUGCUUUUGCU                                                                                                                                                                      |
| NP101         | AGUAGAAACAAGGGUAUUUUUCUJUUAAUUGUCGUACUCACUJAGUUUUGGUCGCCAUGAUUUUGAUGUCACUCUGUGAGUGAUUAUCUJACCCUGCUUUUGCU                                                                                                                                             |
| NP125         | AGUAGAAACAAGGGUAUUUUUCUJUUAAUUGUCGUACUCUCUJAGUUUUGGUCGCCAUGAUUUUGAUGUCACUCUGUGAGUGAUUAUCUJACCCUGCUUUUGCU                                                                                                                                             |
| NP149         | AGUAGAAACAAGGGUAUUUUUCUJUUAAUUGUCGUACUCUCUJAGUUUUGGUCGCCAUGAUUUUGAUGUCACUCUGUGAGUGAUUAUCUJACCCUGCUUUUGCU                                                                                                                                             |
| NP246         | AGUAGAAACAAGGGUAUUUUUCUJUUAAUUGUCGUACUCUCUJAGUUUUGGUCGCCAUGAUUUUGAUGUCACUCUGUGAGUGAUUAUCUJACCCUGCUUUUGCU                                                                                                                                             |
| NP583         | AGUAGAAACAAGGGUAUUUUUCUJUUAAUUGUCGUACUCUCUJAGUUUUGGUCGCCAUGAUUUUGAUGUCACUCUGUGAGUGAUUAUCUJACCCUGCUUUUGCU                                                                                                                                             |
| HA77          | AGUAGAAACAAGGGUGUUUUUCUJUAUUAUUCUGAAAUCCUJUCAUUUUGGUUGUUUUAAUUUUCGCCUGCUUUUGCU                                                                                                                                                                       |
| HA245         | AGUAGAAACAAGGGUGUUUUUCUJUAUUAUUCUGAAAUCCUJAAUCUCAGAUJCAUUAUCUGCACUGCAAAGACCCAUUAGAACACAUCCAGAAACUGAUUUGCCCCAGGGAGACCAAAGCACCAGCCUCCUCGUGGCGCCGGCUGGGCAACAUUCCGAGGGGACCGUCCUCCGUAUUGGCGAAUUGGGACUCUJAGUACAAAAGCCUJCAUUUUGGUUGUUUUAAUUUUCGCCUGCUUUUGCU |
| NA76          | AGUAGAAACAAGGAGUUUUUGAACAAACUACUJUGUCAUUUCUGGUUUUGGAUUCAUUUAAACUCCUGCUUUUGCU                                                                                                                                                                         |
| NA244         | AGUAGAAACAAGGAGUUUUUGAACAAACUACUJUGUCAUUGGUGAACGGGAGCUCAGCACCGUCUGGCCAAGACCAUCUJACAGAUJACACCAUUCACACCACAAAAAGAAUJAGUCUCCACAAUCCAUUAUJAGAUUAUUUUCUJAAUUAUUCGCUUUUGCU                                                                                  |
| 49-vRNA spike | AGUAGAAACAAGGGUGUUUUUCAGAUUCUGAGUCACCCUGCUUUUGCU                                                                                                                                                                                                     |
| 37-cRNA spike | AGCAAAAGCAGGGUAGACUJAGUACCCUJUGUUUCUACU                                                                                                                                                                                                              |



**Table S3 | Primer-extension and RT-PCR primers**

| Primer name     | Sequence (5' to 3')                                                   | Target                             |
|-----------------|-----------------------------------------------------------------------|------------------------------------|
| NP-             | AGCAAAAGCAGGGTAGACTAGT                                                | NP negative strand (3' terminus)   |
| NP-2            | AAAGAAAAATACCCTTGTTTC                                                 | NP negative strand                 |
| 5S100           | TCCCAGGCGGTCTCCCATCC                                                  | 5S rRNA (100 nt product)           |
| NA-             | GTTCAAAAACTCCTTGTTTC                                                  | NA negative strand                 |
| HA-             | GGAAAAACACCCTTGTTTCT                                                  | HA negative strand                 |
| NP 5'           | AGTAGAAACAAGGGTATTTTTCT                                               | NP positive strand (5' terminus)   |
| NP 3'           | AGCAAAAGCAGGGTAGATAATC                                                | NP positive strand (3' terminus)   |
| PB2v            | AGCGAAAGCAGGTCAATTATAT                                                | PB2 negative strand (3' terminus)  |
| PB2c            | AGTAGAAACAAGGTCGTTTTTAAAC                                             | PB2 positive strand (5' terminus)  |
| Lv3ga           | GTTCAGACGTGTGCTCTTCCGATCTAGCG+AAAGCAGG                                | vRNA RT primer (contains LNA)      |
| Lv3aa           | GTTCAGACGTGTGCTCTTCCGATCTAGC+A+AAAGCAGG                               | vRNA RT primer (contains LNA)      |
| Lv5             | CACGACGCTCTTCCGATCTHNNNNNNNAGTAGAA+A+CAAGG                            | vRNA forward primer (contains LNA) |
| Lc3             | GTTCAGACGTGTGCTCTTCCGATCTAGTAGAA+A+CAAGG                              | cRNA RT primer (contains LNA)      |
| Lc5a            | CACGACGCTCTTCCGATCTHNNNNNNNAGC+AAAAGCAGG                              | cRNA forward primer (contains LNA) |
| Lc5g            | CACGACGCTCTTCCGATCTHNNNNNNNAGCGAAAGCAGG                               | cRNA forward primer (contains LNA) |
| P5              | AATGATACGGCGACCACCGAGATCTACACTCTTTC-<br>CCTACACGACGCTCTTCCGATCT       | vDNA and cDNA forward              |
| i7003           | CAAGCAGAAGACGGCATACGAGATACTGGTGTGA-<br>CTGGAGTTCAGACGTGTGCTCTTCCGATCT | vDNA and cDNA reverse              |
| Actin human fw  | AGAGTACGAGCTGCCTGAC                                                   | Actin B mRNA (forward)             |
| Actin human rv  | AGCACTGTGTTGGCGTACAG                                                  | Actin B mRNA (reverse)             |
| Actin ferret fw | GATATTACCAGATATCTTATCAAGCTGCTGC                                       | Actin B mRNA (forward)             |
| Actin ferret rv | GCGGCCATCTGGGAGTGTGTAAG                                               | Actin B mRNA (reverse)             |
| H5N1_VN NA fw   | CAATTTGGACTAGTGGGAGCAGC                                               | NA H5N1 VN qRT-PCR (forward)       |
| H5N1 VN NA rv   | TTGAACAACTACTTGTCAATGGTGAATG                                          | NA H5N1 VN qRT-PCR (reverse)       |
| NA rv           | GCAACTCAGCACCGTCTGGCC                                                 | NA qRT-PCR (reverse)               |
| NA 1918 fw      | TGCTTCTGGGTTGAATTAATCAGGG                                             | NA BM 1918 qRT-PCR (forward)       |
| NA NL fw        | GCTTCTGGGTTGAACATAATCAGAGGG                                           | NA NL 2009 qRT-PCR (forward)       |
| NA IND fw       | GTTTCTGGGTTGAGTTGATCAGAGGG                                            | NA Ind H5N1                        |

+ LNA base
